## COMMENTS AND RESPONSES

### Prediction of Mortality Using Measures of Cardiac Autonomic Dysfunction in the Diabetic and Nondiabetic Population: The MONICA/KORA Augsburg Cohort Study

Response to Salvi et al.

We thank Salvi et al. (1) for their interest in our study (2). While there is no doubt that a number of diseases and drugs may contribute to corrected QT (QTc) interval prolongation, cardiac autonomic neuropathy (CAN) has been identified as one of these contributing factors. CAN is 2.3 times (95% CI 1.9–2.7) more likely to be present in diabetic patients with than in those without QTc prolongation (2). Recently, a reasonable sensitivity of 76.5%, specificity of 75%, and positive predictive value of 81.3% of QTc prolongation for the diagnosis of CAN were reported in type 2 diabetic patients (3). In a population-based study, diabetic patients with QTc prolongation but without prior physician-diagnosed heart disease had a threefold increased risk of primary cardiac arrest after accounting for autonomic and electrocardiogram characteristics (4), suggesting that risk stratification by mea-

surement of the QTc interval may be useful in subjects with diabetes.

Because the prevalence of CAN increases with the severity of peripheral neuropathy (5), a concomitant QTc prolongation and reduction in heart rate variability (HRV) would be expected. Therefore, it is surprising that such a gradient was not seen in the studies by Salvi et al. for both QTc (6) and HRV in diabetic patients with and without peripheral neuropathy. However, it remains unclear how peripheral neuropathy was defined and assessed in their study. Moreover, possible selection bias cannot be excluded, as these patients originated from two phase II studies.

We disagree with the view of Salvi et al. that defining a cutoff value for HRV would have made our observations clinically more relevant. We have not defined abnormal ranges for the measures of HRV used in our study because we computed HRV from relatively short 20-s resting electrocardiogram recordings for epidemiological purposes rather than for the use clinical practice. However, we previously demonstrated that 22% of type 2 diabetic patients have definite CAN (7). Thus, using the lowest quartile is compatible with the expected percentage of HRV abnormalities.

DAN ZIEGLER, MD, PHD, FRCP  
FOR THE KORA STUDY GROUP

From the Institut für Klinische Diabetologie, Deutsches Diabetes-Zentrum, Düsseldorf, Germany.  
Corresponding author: Dan Ziegler, dan.ziegler@ddz.uni-duesseldorf.de.  
DOI: 10.2337/dc08-1136

© 2008 by the American Diabetes Association.  
Readers may use this article as long as the work is properly cited, the use is educational and not for profit, and the work is not altered. See <http://creativecommons.org/licenses/by-nc-nd/3.0/> for details.

#### References

1. Salvi V, Hingorani P, Ramasamy A, Kothari S: Prediction of mortality using

measures of cardiac autonomic dysfunction in the diabetic and nondiabetic population: the MONICA/KORA Augsburg cohort study: response to Ziegler et al. (Letter). *Diabetes Care* 31:e74, 2008. DOI: 10.2337/dc08-1002

2. Ziegler D, Zentai CP, Perz S, Rathmann W, Haastert B, Doring A, Meisinger C: Prediction of mortality using measures of cardiac autonomic dysfunction in the diabetic and nondiabetic population: the MONICA/KORA Augsburg cohort study. *Diabetes Care* 31:556–561, 2008
3. Whitsel EA, Boyko EJ, Siscovick DS: Reassessing the role of QTc in the diagnosis of autonomic failure among patients with diabetes: a meta-analysis. *Diabetes Care* 23:241–247, 2000
4. Pappachan JM, Sebastian J, Bino BC, Jayaprakash K, Vijayakumar K, Sujathan P, Adinegara LA: Cardiac autonomic neuropathy in diabetes mellitus: prevalence, risk factors and utility of corrected QT interval in the ECG for its diagnosis. *Postgrad Med J* 84:205–210, 2008
5. Whitsel EA, Boyko EJ, Rautaharju PM, Raghunathan TE, Lin D, Pearce RM, Weinmann SA, Siscovick DS: Electrocardiographic QT interval prolongation and risk of primary cardiac arrest in diabetic patients. *Diabetes Care* 28:2045–2047, 2005
6. Ziegler D, Dannehl K, Mühlen H, Spüler M, Gries FA: Prevalence of cardiovascular autonomic dysfunction assessed by spectral analysis, vector analysis, and standard tests of heart rate variation and blood pressure responses at various stages of diabetic neuropathy. *Diabet Med* 9:806–814, 1992
7. Salvi V, Hingorani P, Mahajan V, Bhoir H, Karnad D, Kothari S, Narula D, Lokhandwala Y: Comparison of QTc interval in diabetics with and without neuropathy and healthy normal volunteers. *Indian Heart J* 58:418–423, 2007
8. Ziegler D, Gries FA, Mühlen H, Rathmann W, Spüler M, Lessmann F, DiaCAN Multicenter Study Group: Prevalence of cardiovascular autonomic and peripheral diabetic neuropathy in patients attending diabetes centers. *Diabet Metab* 19:143–151, 1993
